# Supplementary material for: Cross-sectional associations between prenatal maternal per- and poly-fluoroalkyl substances and bioactive lipids in three Environmental influences on Child Health Outcomes (ECHO) cohorts
Source: PubMed Central journal article supplement — medRxiv. 2023 Nov 7:2023.11.03.23297930. Preprint. [Version 2] doi: 10.1101/2023.11.03.23297930 (PMC10635258; doi:10.1101/2023.11.03.23297930), 2023-11-07

**Supplemental Figure 1.** Flow diagram of final sample selection across CiOB, IKIDS, and PROTECT cohorts

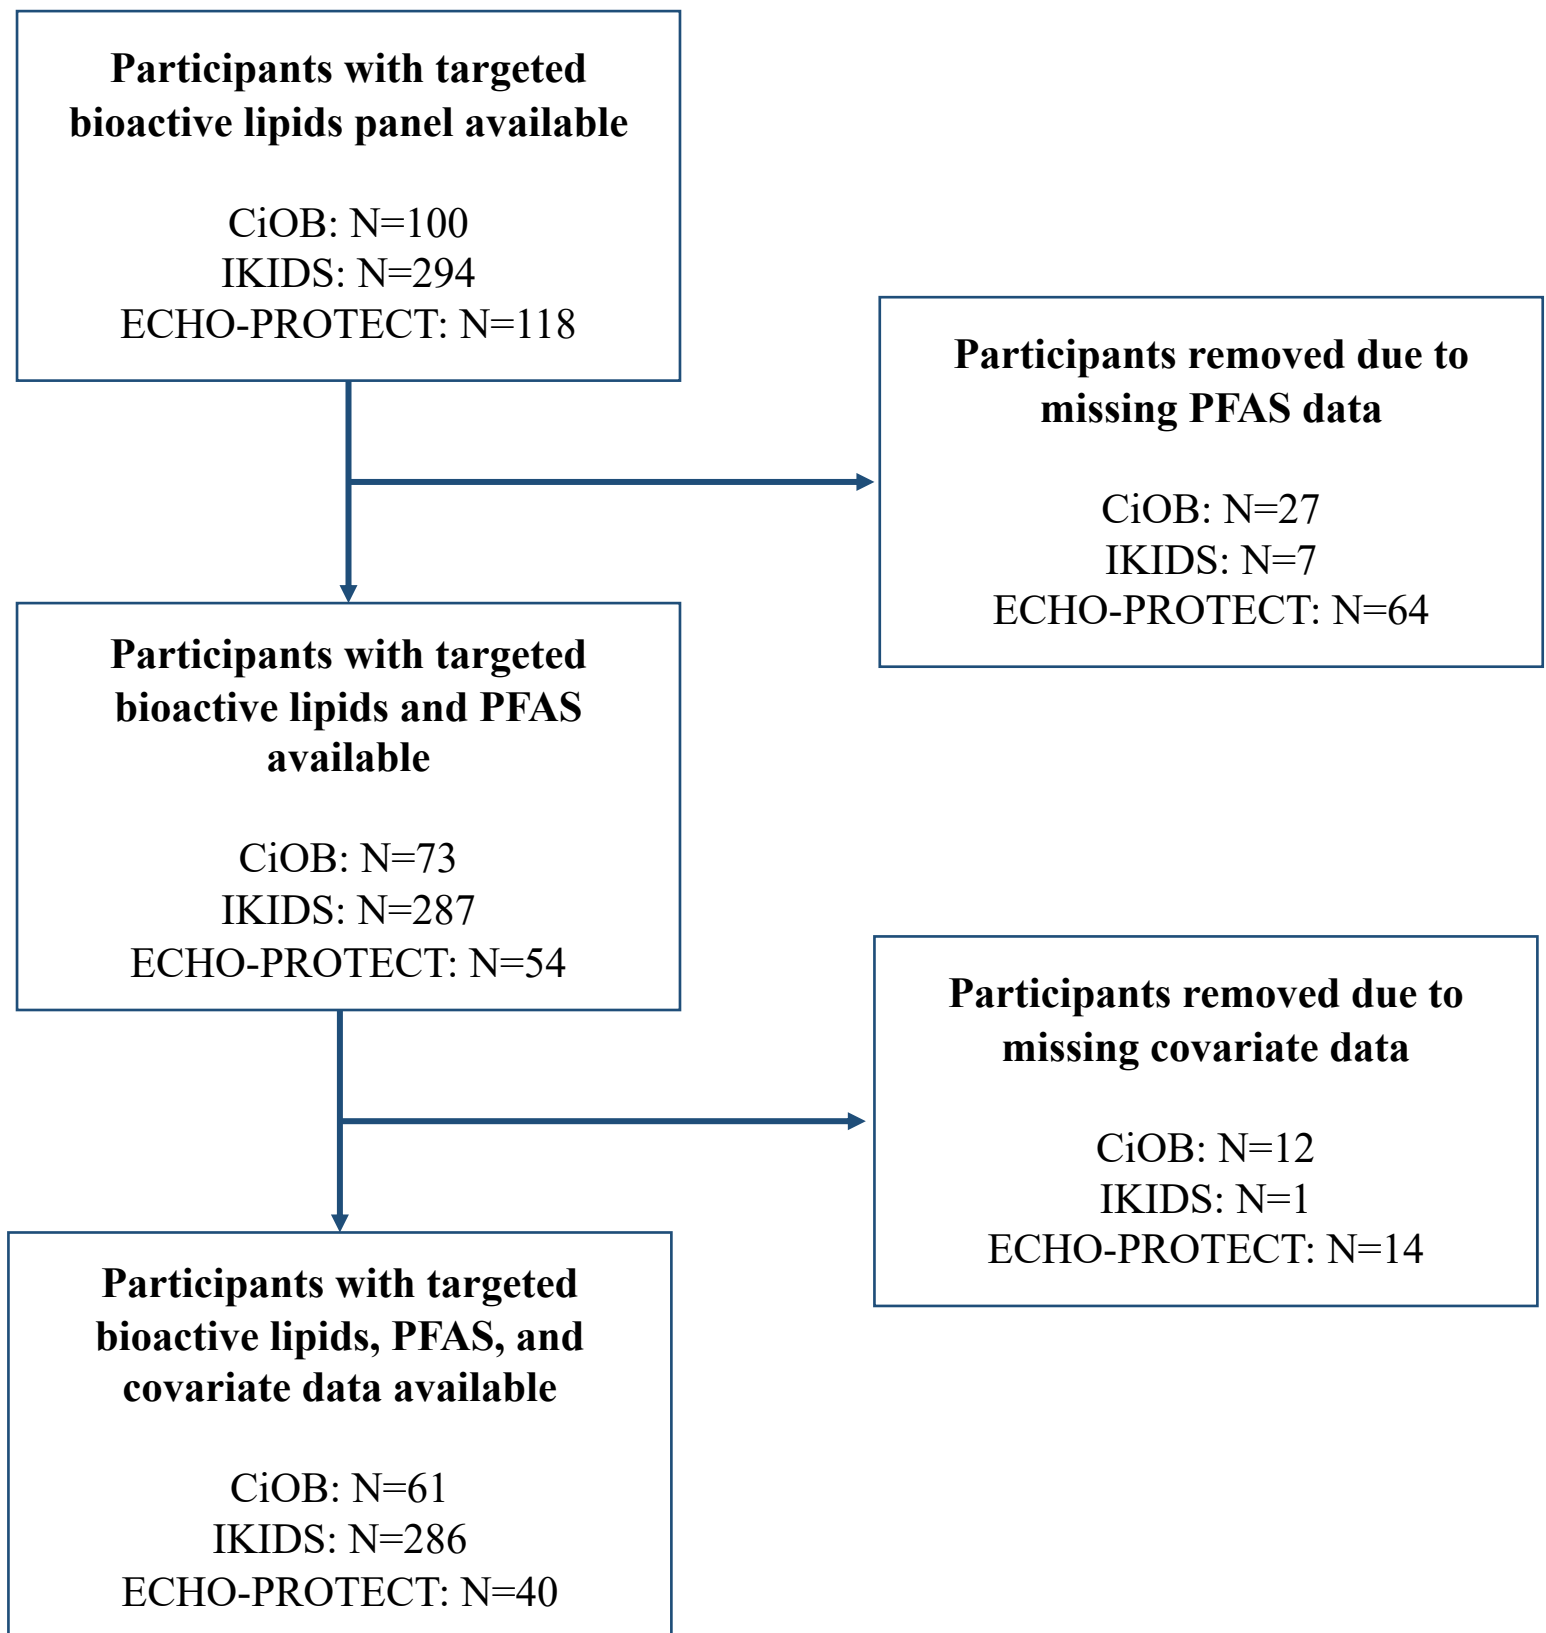

Supplement: media-1.pdf [file media-1.pdf]
